# Supplementary material for: The microRNA expression profile of mouse Müller glia in vivo and in vitro
Source: PubMed Central journal article supplement (PMC5064377; doi:10.1038/srep35423), 2016-10-14
Supplement: srep35423-s1.pdf [file srep35423-s1.pdf]

**Supplemental Files for:**

**The microRNA expression profile of mouse Müller glia *in vivo* and *in vitro*.**

**Stefanie G. Wohl and Thomas A. Reh**

Department of Biological Structure, University of Washington, School of Medicine, Seattle, WA, USA

Correspondence: tomreh@uw.edu

Supplemental Figures 1-3

Supplemental Tables 1-6

**Supplement Figure 1. Purity of FAC-sorted cells from adult R1bp-CreER: Stop<sup>f/f</sup>-tdTomato mice. A-A''':** Gating for FACS and proportions of sorted cells for adult retinas. A: all cells in gate P1 (blue dots) have been sorted based on their size (forward scattered, FSC) and fluorescence/granularity (side scattered, SSC). Very small cells and debris (black dots) have been excluded. A': tdTomato<sup>+</sup> cells were found in gate P3 (brightest red fluorescence), while the vast majority of tdTomato<sup>-</sup> cells were found in gate P2 (no red fluorescence). The percentage of the P2 and P3 events of either P1 or total events or are shown in A''. A''' shows the fraction of the sorted tdTomato<sup>+</sup> cells in the SSC-A and FSC-A scheme. B, D: Immunofluorescent labeling with antibodies against tdTomato, Sox9 (B), Sox2 (D) and DAPI nuclear staining of the MG-enriched tdTomato<sup>+</sup> FAC-sorted fractions, plated on a feeder layer of young glia, after 8 days *in vitro* (DIV). C, E: Percentage of tdTomato<sup>+</sup>Sox9<sup>+</sup> (C) or tdTomato<sup>+</sup>Sox2<sup>+</sup> (E) cells found in the P3-gated (tdTomato<sup>+</sup> MG) and P2-gated (tdTomato<sup>-</sup> neuronal) FAC-sorted fractions of 2 mice. F-H: Immunofluorescent labeling with antibodies against tdTomato and Sox2 and DAPI nuclear staining of a periphery of a retinal cross section (adult). I: Retinal cross section of a R1bp-CreER-tdTomato: Nrl-GFP mouse. J-K: Live images of plated tdTomato<sup>+</sup> Nrl-GFP<sup>-</sup> cells (MG, C, C') and tdTomato<sup>-</sup> Nrl-GFP<sup>+</sup> cells (neurons/rods, D, D') after FACS. ONL: outer nuclear layer, OPL: outer plexiform layer, INL: inner nuclear layer, IPL: inner plexiform layer, GCL: ganglion cell layers, RPE: retinal pigment epithelium, CE: ciliary epithelium.

**Supplement Figure 2. Purity of FAC-sorted cells from P11 R1bp-CreER: Stop<sup>f/f</sup>-tdTomato mice. A-A'':** Gating for FACS and proportions of sorted cells from P11 retinas: all cells in gate P1 (blue dots) have been sorted based on their size (forward scattered, FSC) and fluorescence/granularity (side scattered, SSC). Very small cells and debris (black dots) have been excluded. tdTomato<sup>+</sup> cells were found in gate P3 (brightest fluorescence), while the vast majority of tdTomato<sup>-</sup> cells were found in gate P2 (no fluorescence, A'). The

percentage of the P2- and P3-gated events of either P1 or total events or are shown in A''. A''' shows the fraction of the sorted tdTomato<sup>+</sup> cells in the SSC and FSC-A scheme. **B-E:** Live images of cultured P11 FAC-sorted tdTomato<sup>+</sup> (MG, B, B', D, D') and tdTomato<sup>-</sup> cells (neurons, C, C', E, E') after the sort (B, C) and after 5 DIV (D, E). **F:** Number of tdTomato<sup>+</sup> cells per field found in the tdTomato<sup>+</sup> (MG) and tdTomato<sup>-</sup> (neurons) cultured fractions 5 days after FACS. **G, H:** Immunofluorescent labeling of tdTomato<sup>+</sup> cells with Id1 and DAPI (G) and Sox2 and DAPI (H) to confirm glial identity (from 2 independence sorts, total n = 6 mice). **I:** Percentage of tdTomato<sup>+</sup>Id1<sup>+</sup> cells of total Id1<sup>+</sup> or DAPI<sup>+</sup> cells. **J:** Percentage of tdTomato<sup>+</sup>Sox2<sup>+</sup> cells of total Sox2<sup>+</sup> or DAPI<sup>+</sup> cells. Significant differences are indicated, \*\*: p > 0.01, Student's t-test for independent samples and Levene's test for equality of variances.

**Supplement Figure 3: Most MG miRNAs decline in the early culture period.** **A.** Scatter plot of Log2 counts of the miRNAs expressed in P11 MG and 8 DIV MG. The red dots represent miRNAs expressed higher in P11 MG *in vivo* than in 8 DIV MG, the black dots miRNAs higher expressed in 8 DIV MG than P11 MG *in vivo*. **B, C:** Bar graphs of 4 mGliomiRs which expression levels decreased after 8 DIV as compared to P11 MG *in vivo* (B) and of 3 mGliomiRs which expression levels increased after 8 DIV as compared to P11 MG *in vivo* (C). **D, E:** Bar graphs of 10 shared miRs in which expression levels decreased after 8 DIV as compared to P11 MG *in vivo* (D) and of 3 shared miRs in which expression levels increased after 8 DIV as compared to P11 MG *in vivo* (E). Bar graphs cutoff 20,000 counts.

**A** Specimen\_001-adult tomato 2015-7-13

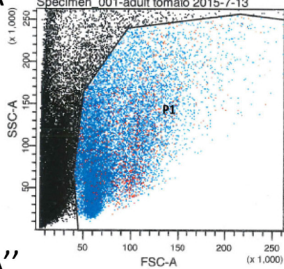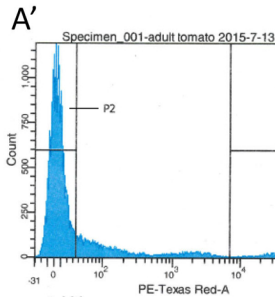

**A''**

Tube: adult tomato 2015-7-13

| Population | #Events | %Parent | %Total |
|------------|---------|---------|--------|
| All Events | 63,656  | ####    | 100.0  |
| P1         | 20,000  | 31.4    | 31.4   |
| P2         | 14,602  | 73.0    | 22.9   |
| P3         | 934     | 4.7     | 1.5    |
| P4         |         |         |        |

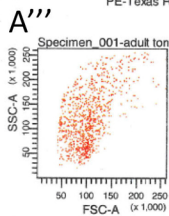

positives (Müller glia)

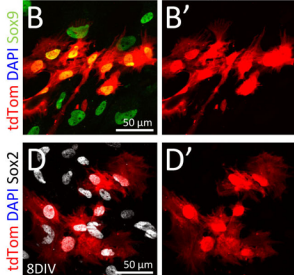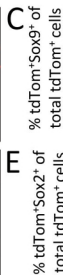

tdTomato DAPI Sox2

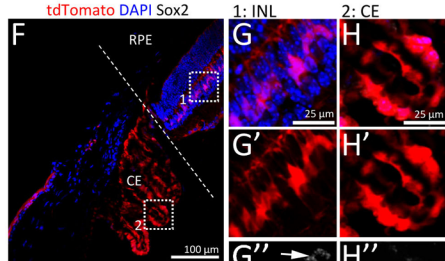

positives (Müller glia)

negatives (neurons)

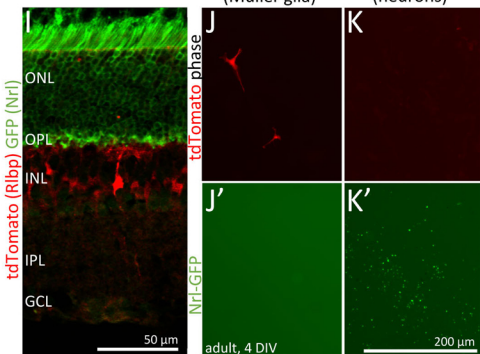

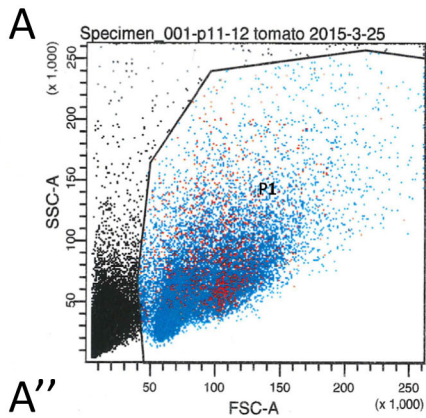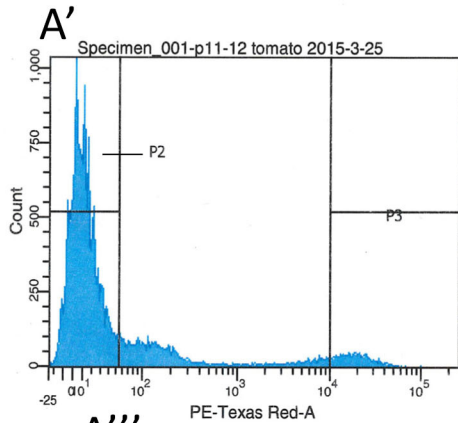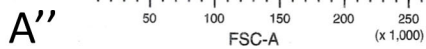

Tube: p11-12 tomato 2015-3-25

| Population | #Events | %Parent | %Total |
|------------|---------|---------|--------|
| All Events | 56,168  | ####    | 100.0  |
| P1         | 20,000  | 35.6    | 35.6   |
| P2         | 15,156  | 75.8    | 27.0   |
| P3         | 1,095   | 5.5     | 1.9    |
| P4         |         |         |        |
| P5         |         |         |        |

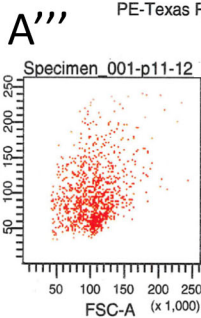

positives (Müller glia)

negatives (neurons)

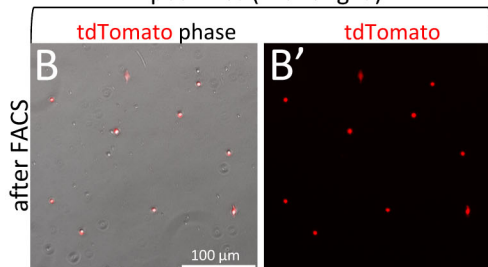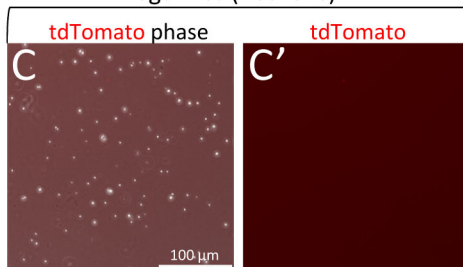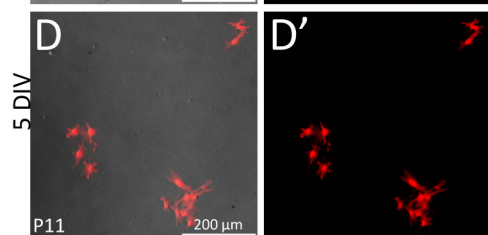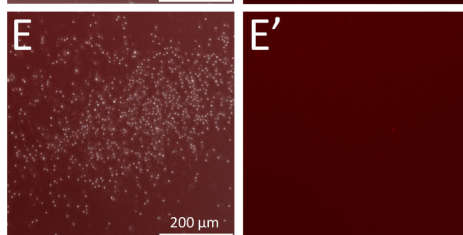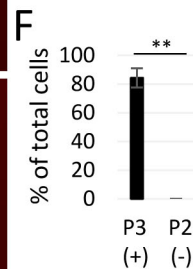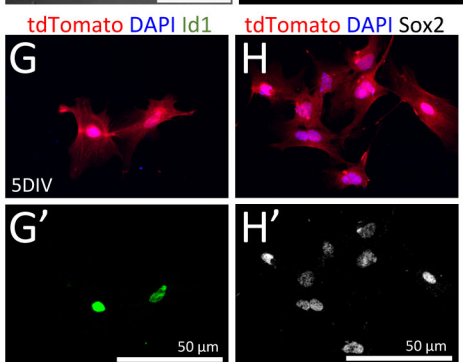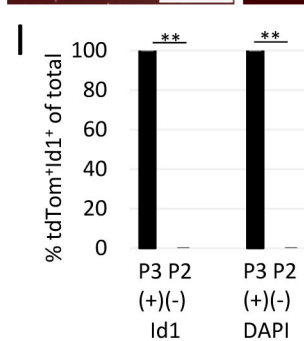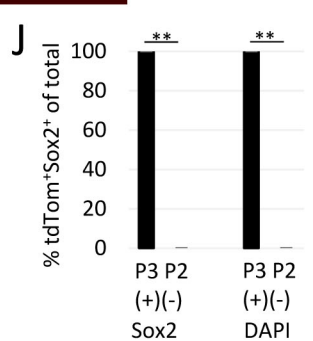

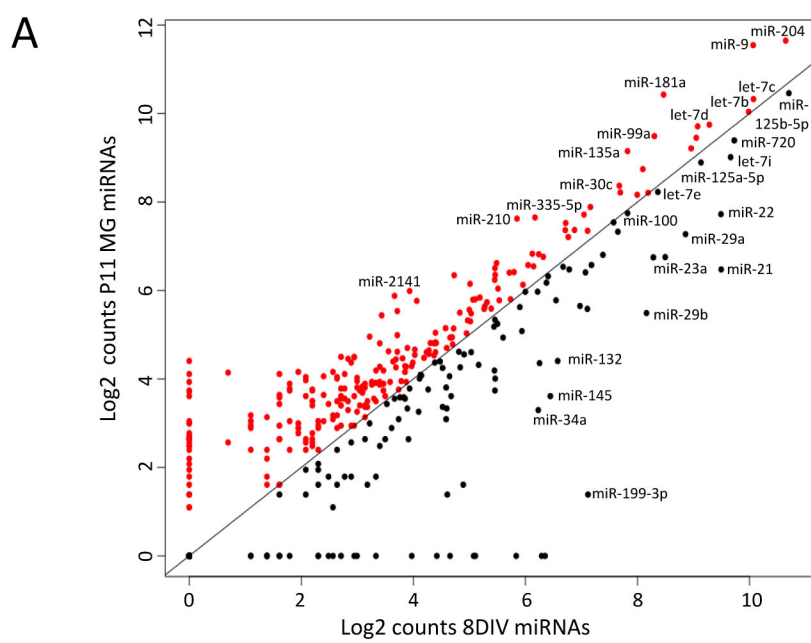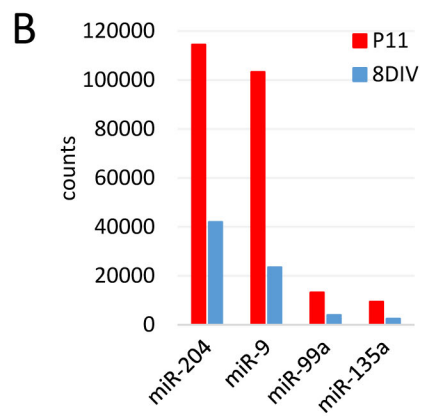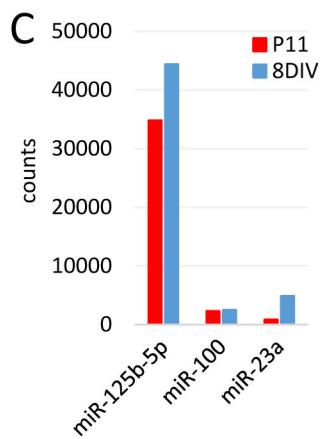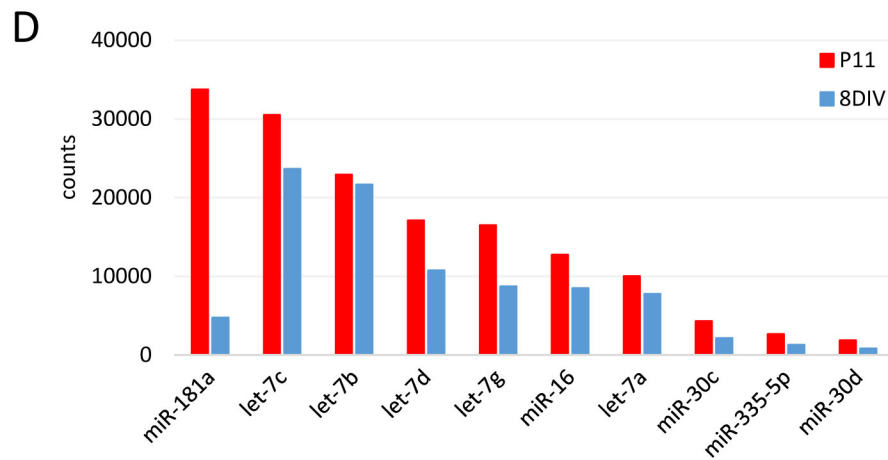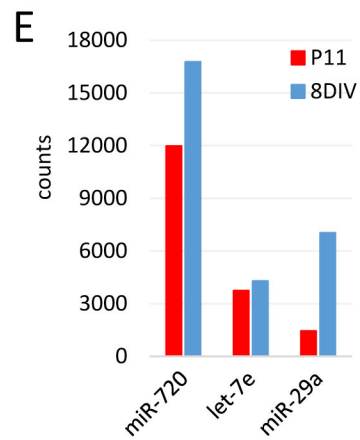

**Supplemental Table 1: FACS data - input and purity.**

| <b>sample</b> | <b># of sorts</b> | <b># of retinas</b> | <b># of cells in suspension "positives"</b> | <b>postsort purity "positives"</b> | <b>% of total P1 events</b> | <b>% of total events</b> | <b># of cells in suspension "negatives"</b> | <b>postsort purity "negatives"</b> |
|---------------|-------------------|---------------------|---------------------------------------------|------------------------------------|-----------------------------|--------------------------|---------------------------------------------|------------------------------------|
| adult         | 6                 | 40                  | 4444839                                     | 96%                                | 5%                          | 1.8%                     | 56.5 x 10 <sup>6</sup>                      | 0%                                 |
| P11/12        | 5                 | 32                  | 3378620                                     | 95%                                | 4%                          | 2.1%                     | 29.7 x 10 <sup>6</sup>                      | 0%                                 |

**Supplemental Table 2: Expression levels of the highly expressed 23 miRNAs (cutoff 2000 counts) in adult Müller glia compared to adult neurons and young Müller glia (mGliomiRs are bold).**

| miRNA                  | Müller glia (MG) adult (counts) | Neurons adult (counts) | adult MG vs. neurons (fold) | adult neurons vs. MG (fold) | Müller glia P11/12 (counts) | % increase P11 to adult |
|------------------------|---------------------------------|------------------------|-----------------------------|-----------------------------|-----------------------------|-------------------------|
| <b>mmu-miR-204</b>     | <b>213460</b>                   | <b>11740</b>           | <b>18</b>                   | <b>0</b>                    | <b>62946</b>                | <b>71</b>               |
| <b>mmu-miR-125b-5p</b> | <b>81882</b>                    | <b>9291</b>            | <b>9</b>                    | <b>0</b>                    | <b>19159</b>                | <b>77</b>               |
| <b>mmu-miR-9</b>       | <b>56346</b>                    | <b>8338</b>            | <b>7</b>                    | <b>0</b>                    | <b>56806</b>                | <b>-1</b>               |
| mmu-miR-181a           | 36482                           | 69753                  | 1                           | 2                           | 18556                       | 49                      |
| mmu-let-7c             | 19558                           | 11497                  | 2                           | 1                           | 16782                       | 14                      |
| mmu-miR-720            | 17859                           | 15686                  | 1                           | 1                           | 6585                        | 63                      |
| <b>mmu-miR-99a</b>     | <b>14804</b>                    | <b>2394</b>            | <b>6</b>                    | <b>0</b>                    | <b>7259</b>                 | <b>51</b>               |
| mmu-let-7b             | 13480                           | 12275                  | 1                           | 1                           | 12600                       | 7                       |
| mmu-let-7g             | 11687                           | 41497                  | 0                           | 4                           | 9065                        | 22                      |
| mmu-miR-30c            | 10425                           | 22609                  | 0                           | 2                           | 2367                        | 77                      |
| mmu-let-7d             | 9932                            | 26367                  | 0                           | 3                           | 9405                        | 5                       |
| <b>mmu-miR-135a</b>    | <b>9588</b>                     | <b>1148</b>            | <b>8</b>                    | <b>0</b>                    | <b>5173</b>                 | <b>46</b>               |
| mmu-miR-29a            | 6511                            | 4391                   | 1                           | 1                           | 792                         | 88                      |
| mmu-let-7a             | 6073                            | 11665                  | 1                           | 2                           | 5513                        | 9                       |
| mmu-miR-16             | 5424                            | 27745                  | 0                           | 5                           | 7007                        | -29                     |
| mmu-miR-125a-5p        | 4213                            | 7019                   | 1                           | 2                           | 4001                        | 5                       |
| <b>mmu-miR-100</b>     | <b>4203</b>                     | <b>2</b>               | <b>2102</b>                 | <b>0</b>                    | <b>1272</b>                 | <b>70</b>               |
| mmu-miR-1944           | 3753                            | 32472                  | 0                           | 9                           | 3448                        | 8                       |
| mmu-miR-22             | 3672                            | 7435                   | 0                           | 2                           | 1244                        | 66                      |
| mmu-miR-30d            | 3493                            | 3976                   | 1                           | 1                           | 1019                        | 71                      |
| mmu-let-7e             | 2831                            | 5004                   | 1                           | 2                           | 2057                        | 27                      |
| mmu-miR-335-5p         | 2487                            | 2568                   | 1                           | 1                           | 1464                        | 41                      |
| <b>mmu-miR-23a</b>     | <b>2485</b>                     | <b>374</b>             | <b>7</b>                    | <b>0</b>                    | <b>472</b>                  | <b>81</b>               |



**Supplemental Table 3: Expression levels of the highly expressed 46 neuronal miRNAs (cutoff 2000 counts) in adult neurons compared to adult Müller glia and young neurons (17 miRNAs with expression levels in MG <20% are bold).**

| miRNA                 | Neurons adult (counts) | MG glia adult (counts) | MG fold vs neurons (adult) | Neurons fold vs MG (adult) | % expression in adult MG | Neurons young (counts) | % increase from P11 to adult in neurons |
|-----------------------|------------------------|------------------------|----------------------------|----------------------------|--------------------------|------------------------|-----------------------------------------|
| <b>mmu-miR-124</b>    | <b>308141</b>          | <b>1011</b>            | <b>0</b>                   | <b>305</b>                 | <b>0.3</b>               | <b>39060</b>           | <b>87</b>                               |
| <b>mmu-miR-183</b>    | <b>101370</b>          | <b>271</b>             | <b>0</b>                   | <b>374</b>                 | <b>0.3</b>               | <b>12473</b>           | <b>88</b>                               |
| <b>mmu-miR-96</b>     | <b>87840</b>           | <b>212</b>             | <b>0</b>                   | <b>414</b>                 | <b>0.2</b>               | <b>16891</b>           | <b>81</b>                               |
| mmu-miR-181a          | 69753                  | 36482                  | 1                          | 2                          | 52                       | 40225                  | 42                                      |
| mmu-let-7g            | 41497                  | 11687                  | 0                          | 4                          | 28                       | 15320                  | 63                                      |
| <b>mmu-miR-1944</b>   | <b>32472</b>           | <b>3753</b>            | <b>0</b>                   | <b>9</b>                   | <b>12</b>                | <b>2813</b>            | <b>91</b>                               |
| mmu-miR-16            | 27745                  | 5424                   | 0                          | 5                          | 20                       | 7497                   | 73                                      |
| mmu-let-7d            | 26367                  | 9932                   | 0                          | 3                          | 38                       | 9005                   | 66                                      |
| mmu-miR-30c           | 22609                  | 10425                  | 0                          | 2                          | 46                       | 4928                   | 78                                      |
| <b>mmu-miR-29c</b>    | <b>19530</b>           | <b>1600</b>            | <b>0</b>                   | <b>12</b>                  | <b>8</b>                 | <b>949</b>             | <b>95</b>                               |
| mmu-miR-720           | 15686                  | 17859                  | 1                          | 1                          | 114                      | 4077                   | 74                                      |
| mmu-let-7b            | 12275                  | 13480                  | 1                          | 1                          | 110                      | 5918                   | 52                                      |
| mmu-miR-204           | 11740                  | 213460                 | 18                         | 0                          | 1818                     | 7275                   | 38                                      |
| mmu-let-7a            | 11665                  | 6073                   | 1                          | 2                          | 52                       | 5499                   | 53                                      |
| mmu-let-7c            | 11497                  | 19558                  | 2                          | 1                          | 170                      | 7258                   | 37                                      |
| <b>mmu-miR-211</b>    | <b>11181</b>           | <b>250</b>             | <b>0</b>                   | <b>45</b>                  | <b>2</b>                 | <b>2732</b>            | <b>76</b>                               |
| mmu-miR-125b-5p       | 9291                   | 81882                  | 9                          | 0                          | 881                      | 3047                   | 67                                      |
| <b>mmu-miR-129-3p</b> | <b>8723</b>            | <b>236</b>             | <b>0</b>                   | <b>37</b>                  | <b>3</b>                 | <b>357</b>             | <b>96</b>                               |
| mmu-miR-9             | 8338                   | 56346                  | 7                          | 0                          | 676                      | 15876                  | -90                                     |
| mmu-miR-25            | 8203                   | 1761                   | 0                          | 5                          | 21                       | 5420                   | 34                                      |
| mmu-miR-22            | 7435                   | 3672                   | 0                          | 2                          | 49                       | 1343                   | 82                                      |
| mmu-miR-342-3p        | 7103                   | 1827                   | 0                          | 4                          | 26                       | 1606                   | 77                                      |
| mmu-miR-125a-5p       | 7019                   | 4213                   | 1                          | 2                          | 60                       | 5689                   | 19                                      |

|                       |             |            |          |             |             |             |           |
|-----------------------|-------------|------------|----------|-------------|-------------|-------------|-----------|
| mmu-let-7f            | 5850        | 1718       | 0        | 3           | 29          | 2539        | 57        |
| <b>mmu-miR-151-5p</b> | <b>5273</b> | <b>942</b> | <b>0</b> | <b>6</b>    | <b>18</b>   | <b>748</b>  | <b>86</b> |
| <b>mmu-miR-1186</b>   | <b>5130</b> | <b>175</b> | <b>0</b> | <b>29</b>   | <b>3</b>    | <b>638</b>  | <b>88</b> |
| mmu-let-7e            | 5004        | 2831       | 1        | 2           | 57          | 1865        | 63        |
| <b>mmu-miR-182</b>    | <b>4959</b> | <b>1</b>   | <b>0</b> | <b>4959</b> | <b>0.02</b> | <b>1039</b> | <b>79</b> |
| <b>mmu-miR-451</b>    | <b>4684</b> | <b>1</b>   | <b>0</b> | <b>4684</b> | <b>0.02</b> | <b>340</b>  | <b>93</b> |
| mmu-miR-29a           | 4391        | 6511       | 1        | 1           | 148         | 127         | 97        |
| mmu-miR-30d           | 3976        | 3493       | 1        | 1           | 88          | 835         | 79        |
| <b>mmu-miR-210</b>    | <b>3767</b> | <b>566</b> | <b>0</b> | <b>7</b>    | <b>15</b>   | <b>858</b>  | <b>77</b> |
| mmu-let-7i            | 3516        | 1820       | 1        | 2           | 52          | 3958        | -13       |
| <b>mmu-miR-500</b>    | <b>3073</b> | <b>1</b>   | <b>0</b> | <b>3073</b> | <b>0.03</b> | <b>534</b>  | <b>83</b> |
| mmu-miR-15b           | 3001        | 697        | 0        | 4           | 23          | 2815        | 6         |
| <b>mmu-miR-1224</b>   | <b>2828</b> | <b>129</b> | <b>0</b> | <b>22</b>   | <b>5</b>    | <b>338</b>  | <b>88</b> |
| <b>mmu-miR-301a</b>   | <b>2750</b> | <b>534</b> | <b>0</b> | <b>5</b>    | <b>19</b>   | <b>895</b>  | <b>67</b> |
| mmu-miR-1937a+b       | 2681        | 817        | 0        | 3           | 30          | 361         | 87        |
| <b>mmu-miR-15a</b>    | <b>2571</b> | <b>376</b> | <b>0</b> | <b>7</b>    | <b>15</b>   | <b>2011</b> | <b>22</b> |
| mmu-miR-335-5p        | 2568        | 2487       | 1        | 1           | 97          | 773         | 70        |
| mmu-miR-191           | 2538        | 671        | 0        | 4           | 26          | 337         | 87        |
| mmu-miR-99a           | 2394        | 14804      | 6        | 0           | 618         | 1691        | 29        |
| mmu-miR-26b           | 2320        | 466        | 0        | 5           | 20          | 346         | 85        |
| mmu-miR-30a           | 2320        | 1612       | 1        | 1           | 69          | 318         | 86        |
| <b>mmu-miR-132</b>    | <b>2018</b> | <b>88</b>  | <b>0</b> | <b>23</b>   | <b>4</b>    | <b>257</b>  | <b>87</b> |
| mmu-miR-148a          | 2015        | 1598       | 1        | 1           | 79          | 685         | 66        |

**Supplemental Table 4: genotyping primers**

| <b>Gene name</b>         | <b>Forward sequence (5' to 3')</b> | <b>Reverse sequence (3' to 5')</b> |
|--------------------------|------------------------------------|------------------------------------|
| <i>Rbp1Cre transgene</i> | CAAGTGTGAGAGACAGCATTG              | TCCTTAGCGCCGTAAATCAA               |
| <i>tdTomato wildtype</i> | AAG GGA GCT GCA GTG GAG TA         | CCG AAA ATC TGT GGG AAG TC         |
| <i>tdTomato mutant</i>   | CTG TTC CTG TAC GGC ATG G          | GGC ATT AAA GCA GCG TAT CC         |
| <i>Nrl-GFP</i>           | TGG AAA CCA AGC TCA CAA CA         | GAA CTT CAG GGT CAG CTT GC         |

**Supplemental Table 5: primary antibodies**

| <b>antibody</b>                      | <b>concentration</b> | <b>Company, Catalog #</b>     |
|--------------------------------------|----------------------|-------------------------------|
| rat anti RFP (tdTomato)              | 1:500                | Antibodies online, ABIN334653 |
| mouse anti glutamine synthetase (GS) | 1:200                | Millipore, MAB 302            |
| rabbit anti Sox9                     | 1:1000               | Millipore, AB5535             |
| goat anti Sox2 (Y-17)                | 1:100                | Santa Cruz, sc-17320          |
| Rabbit anti Id1                      | 1:1000               | BioCheck, BCH-1/37-2          |
| chicken anti GFP                     | 1: 500               | Abcam, ab13970                |

**Supplemental Table 6: RT-qPCR primers for miRNAs**

| <b>miRNA</b> | <b>Forward sequence<br/>(5' to 3')</b> | <b>Reverse sequence (3'<br/>to 5')</b> | <b>Stem loop RT primer (3' to 5')</b>                                     |
|--------------|----------------------------------------|----------------------------------------|---------------------------------------------------------------------------|
| miR-204      | CGC GCT TCC CTT<br>TGT CAT CC          | TCG GAG CGC CAA<br>GTG TAC AG          | TGA GCA GCG CTC GGA GCG<br>CCA AGT GTA CAG GCG CTG<br>CTC AAG GCA TAG     |
| miR-125b-5p  | CCG CTC CCT<br>GAG ACC CTA A           | CGA AGG AAC TTG<br>GGA TAT GAC G       | ATA GGG GCG CGA AGG AAC<br>TTG GGA TAT GAC GCG CCC<br>CTA TTC ACA AGT     |
| miR-9        | GCC GGT CTT<br>TGG TTA TCT AGC         | TTT CCT CGA CCG<br>CAC CAC TC          | AAA TCG CAG CTT TCC TCG<br>ACC GCA CCA CTC GCT GCG<br>ATT TTC ATA CAG     |
| miR-181b     | GCG CCA ACA TTC<br>ATT GCT GTC         | GAT CAA GGG GCA<br>GCA CGT AG          | GGC TAG CAG CGA TCA AGG<br>GGC AGC ACG TAG GCT GCT<br>AGC CAC CCA CCG     |
| miR-9        | GCC GGT CTT<br>TGG TTA TCT AGC         | TTT CCT CGA CCG<br>CAC CAC TC          | AAA TCG CAG CTT TCC TCG<br>ACC GCA CCA CTC GCT GCG<br>ATT TTC ATA CAG     |
| let-7c       | CGG CCT TGA<br>GGT AGT AGG TT          | GCT TCG CTC TTA TTT<br>CCT GAT GG      | CGC TAC AGG CGC TTC GCT<br>CTT ATT TCC TGA TGG GCG<br>CGA TGT CAA CCA TAC |
| 5s           | GCC ATA CCA CCC<br>TGA ACG             | TGC AGG GTC CGA<br>GGT ATT CG          | ACT GCT GCG CTG CAG GGT<br>CCG AGG TAT TCG GCG CAG<br>CAG TAA AGC CTA     |
